# Supplementary material for: Polyolefin catalysis of propene, 1-butene and isobutene monitored using hyperpolarized NMR
Source: Royal Society of Chemistry journal article supplement (doi:10.1039/d0sc05408a), 2021-01-01
Supplement: d0sc05408a1.pdf [file d0sc05408a1.pdf]

## Supporting Information for “Polyolefin Catalysis of Propene, 1-Butene and Isobutene Monitored Using Hyperpolarized NMR”

Yaewon Kim,<sup>a,b,c</sup> Hamidreza Samouei,<sup>a,b</sup> Christian Hilty<sup>\*a</sup>

<sup>a</sup>Department of Chemistry, Texas A&M University, College Station, TX 77843-3255, USA.

<sup>b</sup>Dutch Polymer Institute (DPI), P.O. Box 902, 5600 AX Eindhoven, The Netherlands.

<sup>c</sup>Present address: Department of Radiology and Biomedical Imaging, University of California, San Francisco, CA, 94158, USA.

\*corresponding author. E-mail: [chilty@tamu.edu](mailto:chilty@tamu.edu)

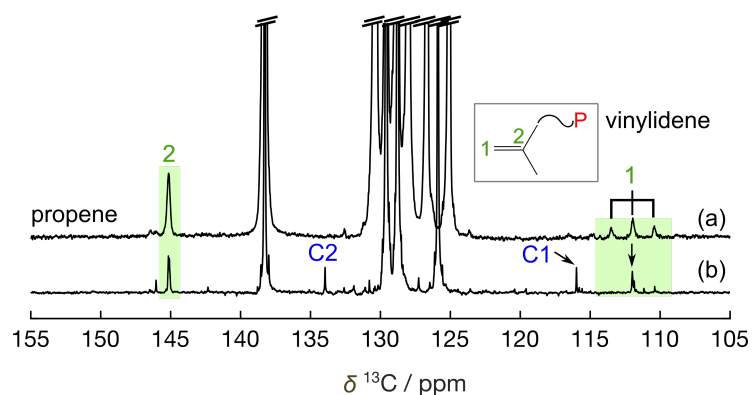

Figure S1. (a)  $^1\text{H}$  coupled and (b)  $^1\text{H}$  decoupled, hyperpolarized  $^{13}\text{C}$  spectra from two separate propene polymerization reactions, showing evidence for the presence of vinylidene chain-ends from side reactions.

(a) Line width change

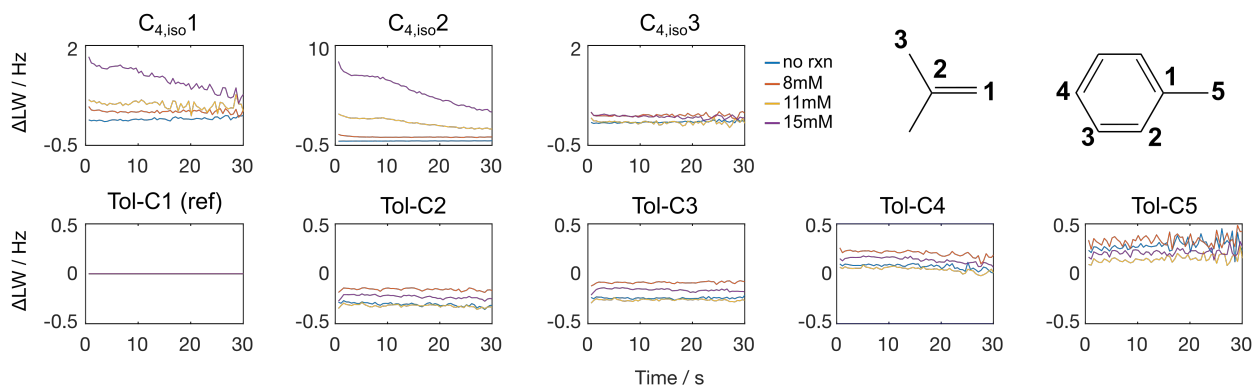

(b) Chemical shift change

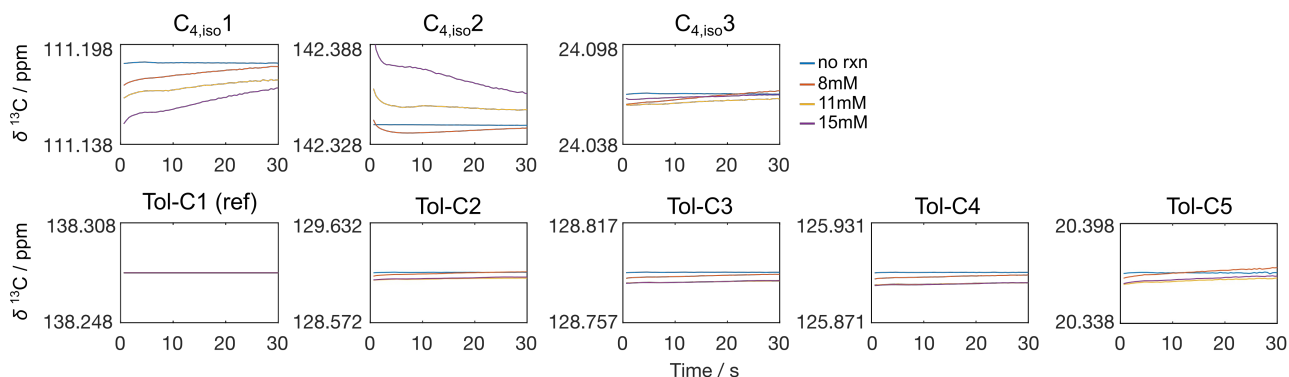

Figure S2. Dynamic changes in (a) line widths and (b) chemical shifts of C1–C3 signals of isobutene ( $\text{C}_{4,\text{iso}1}$ ,  $\text{C}_{4,\text{iso}2}$ , and  $\text{C}_{4,\text{iso}3}$ , respectively) and toluene signals (Tol-Cx, x = 1-5) measured during isobutene polymerization reactions with  $[\text{Zr}] = 0, 8, 11,$  and  $15 \text{ mM}$ . The toluene signal Tol-C1 was used as a reference for the line width change ( $\Delta\text{LW}$ ) and to calibrate the chemical shift. This toluene peak was calibrated against tetramethylsilane (TMS) using a separate sample.
